# Supplementary material for: Cerium Oxide Nanoparticles with Entrapped Gadolinium for High T1 Relaxivity and ROS-Scavenging Purposes
Source: PubMed Central journal article supplement (PMC9218977; doi:10.1021/acsomega.2c03055), 2022-06-07
Supplement: ao2c03055_si_001.pdf [file ao2c03055_si_001.pdf]

## Supporting Information

# Cerium Oxide Nanoparticles with Entrapped Gadolinium for High T<sub>1</sub> Relaxivity and ROS-scavenging Purposes

*Peter Eriksson<sup>1</sup>, Anh H.T. Truong<sup>2</sup>, Caroline Brommesson<sup>1</sup>, Anna du Rietz<sup>1</sup>, Ganesh R. Kokil<sup>3</sup>, Robert D. Boyd<sup>4</sup>, Zhangjun Hu<sup>1</sup>, Tram T. Dang<sup>5</sup> Per O.Å. Persson<sup>5</sup> and Kajsa Uvdal\*<sup>1</sup>*

<sup>1</sup>Division of Molecular Surface Physics and Nanoscience, Department of Physics, Chemistry and Biology (IFM), Linköping University, SE-581 83 Linköping, Sweden

<sup>2</sup> Laboratory of Therapeutic Cellular and Drug Delivery Systems, School of Chemical and Biomedical Engineering (SCBE), Nanyang Technological University, 637459 Singapore

<sup>3</sup> School of Pharmacy, Pharmacy Australia Centre of Excellence, The University of Queensland, Brisbane, QLD Australia

<sup>4</sup> Division of Plasma Coatings Physics Department of Physics, Chemistry and Biology (IFM), Linköping University, SE-581 83 Linköping, Sweden

<sup>5</sup> Division of Thin Film Physics, Department of Physics, Chemistry and Biology (IFM), Linköping University, SE-581 83 Linköping, Sweden

\* Email [kajsa.uvdal@liu.se](mailto:kajsa.uvdal@liu.se) Tel: +46 734607571

## Contents of the material supplied as Supporting Information.

- Zeta potential and Dynamic Light Scattering
- UV-VIS Absorbance
- Three-level phantom model for MRI studies

## Zeta potential and Dynamic Light Scattering

The Zeta potential was measured for the as-prepared Gd-CeNPs and the results are displayed in Figure S1. All Gd-CeNPs have Zeta potential in equal potential range above 30 mV, indicating good colloidal stability for all the prepared nanoparticles.

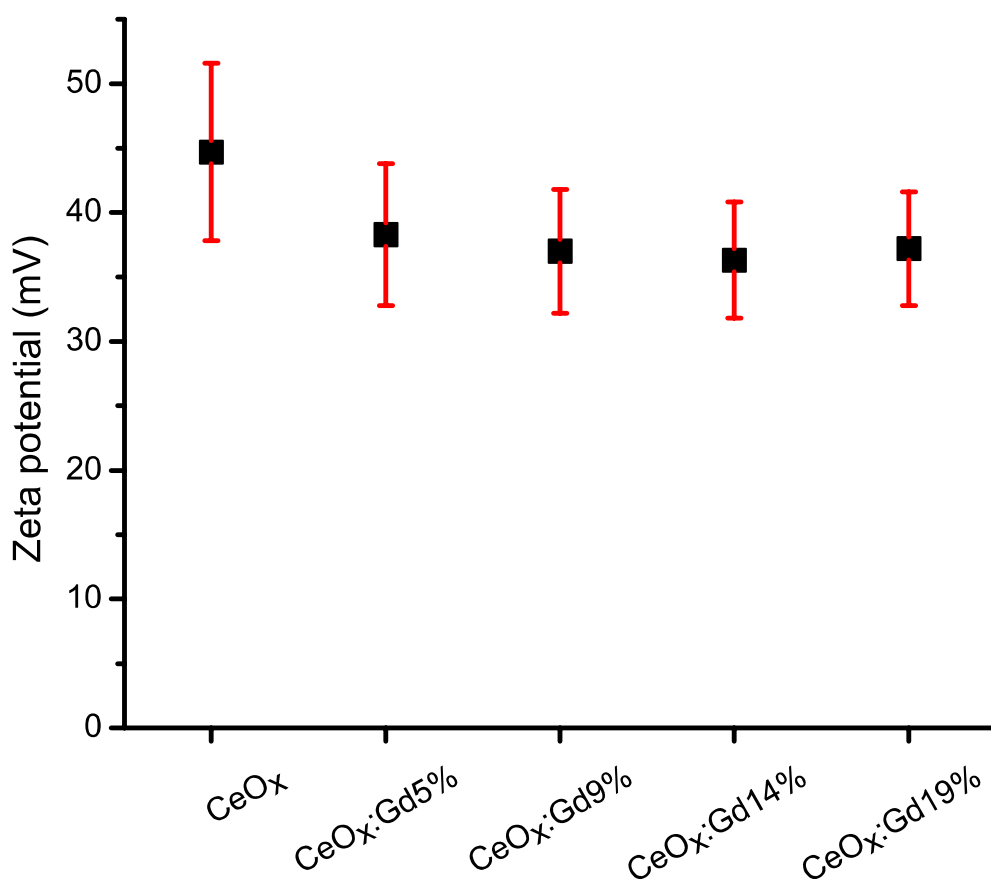

Figure S1. Measured Zeta potential of CeO<sub>x</sub>:Gd0-19%



The number weighted hydrodynamic diameter was evaluated using dynamic light scattering (DLS), and the results are presented in Figure S2. DLS results indicate that all the Gd-CeNPs have a hydrodynamic diameter less than 7 nm. These diameters are reasonable comparing with the XRD data.

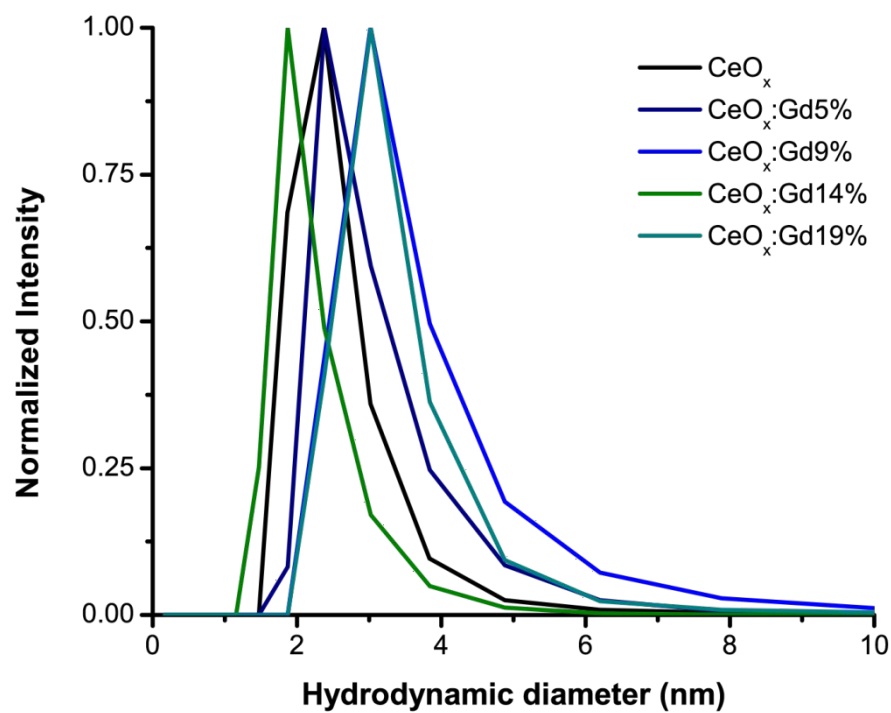

Figure S 2 Measured number weighted hydrodynamic diameters of CeO<sub>x</sub>:Gd0-19%

## UV-VIS Absorbance

The red-shift in absorbance for the different prepared Gd-CeNPs ( $[Ce] = 50 \mu\text{M}$ ) were estimated for different concentrations of  $\text{H}_2\text{O}_2$  at optical density 0.05. An example is showed in Figure S3, where we have treated  $\text{CeO}_x$  with  $1 \mu\text{M}$   $\text{H}_2\text{O}_2$  to  $\Delta\lambda = 69.5 \text{ nm}$ .

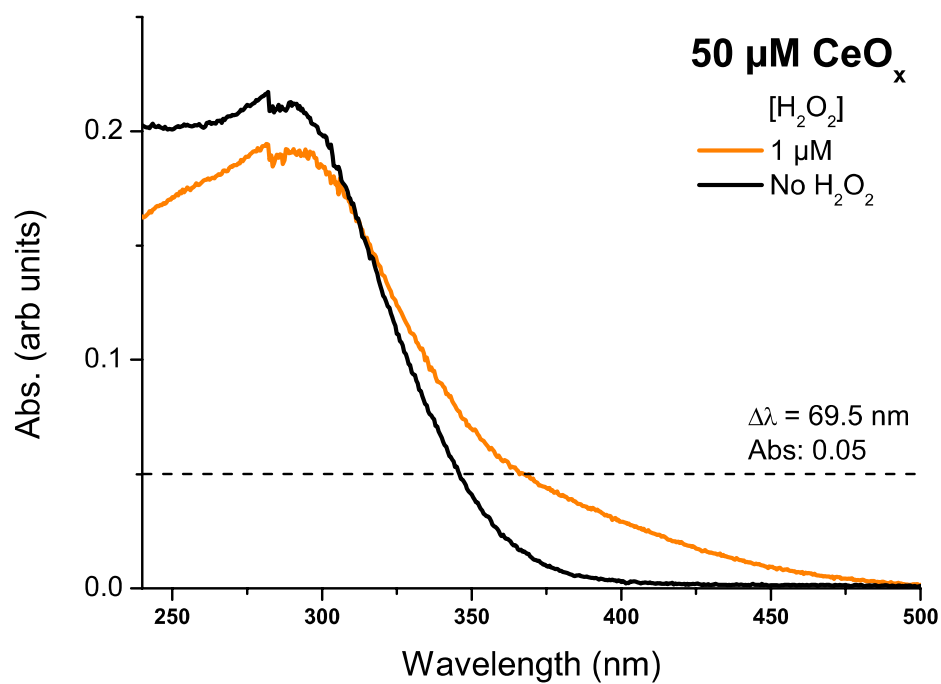

Figure S3 The red-shift ( $\Delta\lambda$ ) was measured at the difference in wavelength at optical density 0.05 for sample, treated and untreated with  $\text{H}_2\text{O}_2$ . In this representative example,  $\text{CeO}_x$  was treated with  $1 \mu\text{M}$   $\text{H}_2\text{O}_2$  had a  $\Delta\lambda = 69.5 \text{ nm}$ .

### Three-level phantom model for MRI studies

The three-level phantom model that was used in magnetic resonance imaging (MRI) experiments is presented in Figure S4.

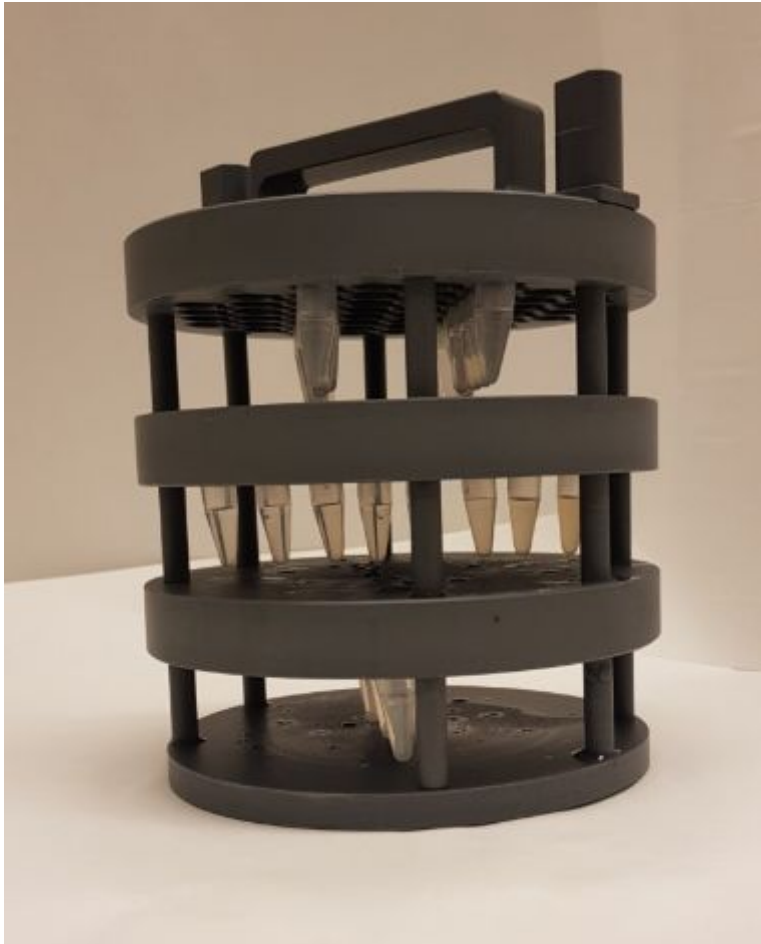

Figure S4. The three-level phantom model used in the MRI-experiments. Photograph courtesy of first author, P. Eriksson. Copyright 2020.
